# Supplementary material for: Field modified spin–orbit potential curves of IBr. Preliminary dynamical results
Source: Royal Society of Chemistry journal article supplement (doi:10.1039/c8cp07248e), 2019-01-01
Supplement: c8cp07248e1.pdf [file c8cp07248e1.pdf]

# Field modified spin-orbit potential curves of IBr. Preliminary dynamical results

Cristina Sanz Sanz<sup>a</sup>, G. A. Worth<sup>b</sup>

<sup>a</sup> *Departamento de Química Física Aplicada, Módulo 14, Universidad Autónoma de Madrid, 28049 Madrid, Spain.*

<sup>b</sup> *Address: Dept. of Chemistry, University College London, 20, Gordon St., WC1H 0AJ, U.K.*

---

## Potential Energy Curves

The data points for the potential curves and couplings for field-free IBr can be provided on request as a tarred archive PEC\_SOC.1dspl. Each file, named sXX\_YY.1dspl, provides the diabatic potential matrix elements at points from 4.2 to 10.0 bohr. XX and YY provide the state numbers. For details of how the curves were calculated as fits to quantum chemistry points, see Sec. 2.2.

---

*Email addresses:* `cristina.sanz@uam.es` (Cristina Sanz Sanz),  
`g.a.worth@ucl.ac.uk` (G. A. Worth)

*URL:* `http://chemb125.ucl.ac.uk/worthgrp/` (G. A. Worth)

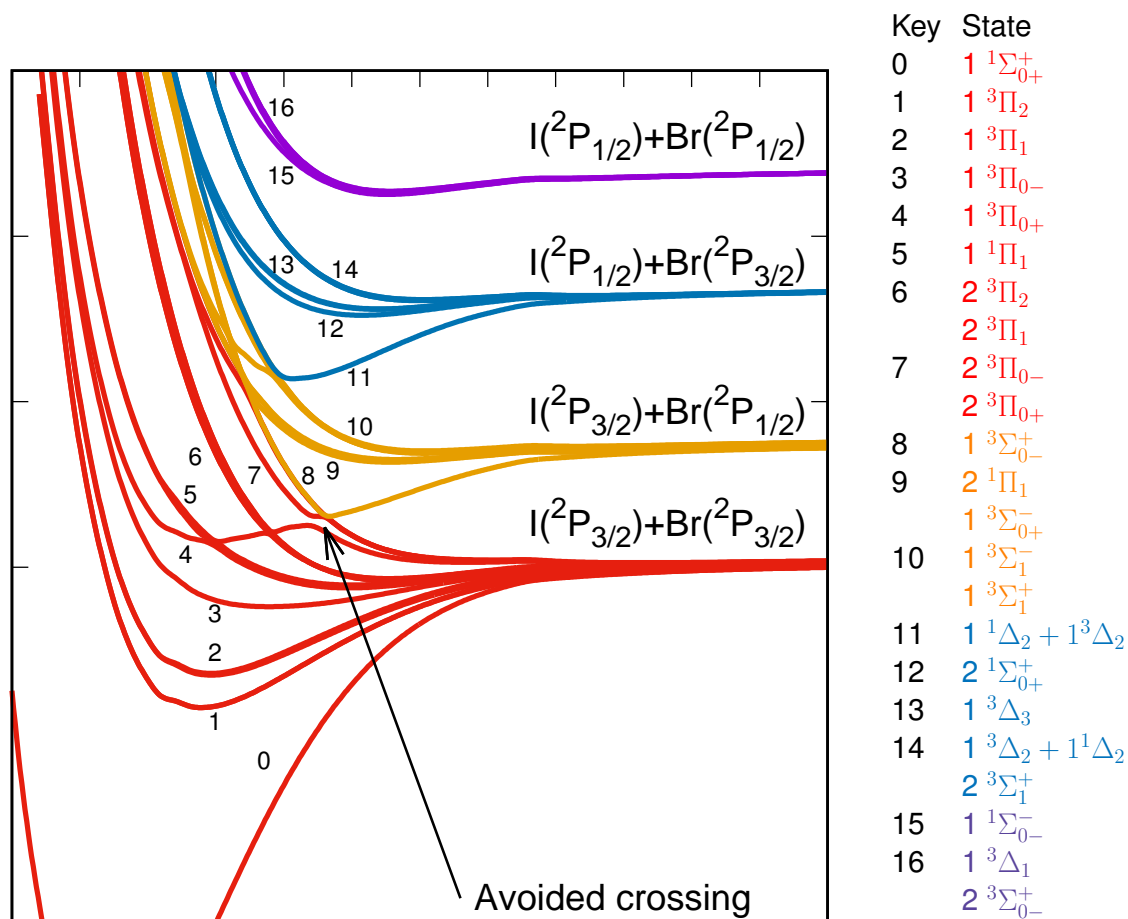

Figure S1: Assignments for the spin-coupled potential energy curves of IBr. The label for each PEC is the main spin-free configuration in the state at the Franck-Condon point.

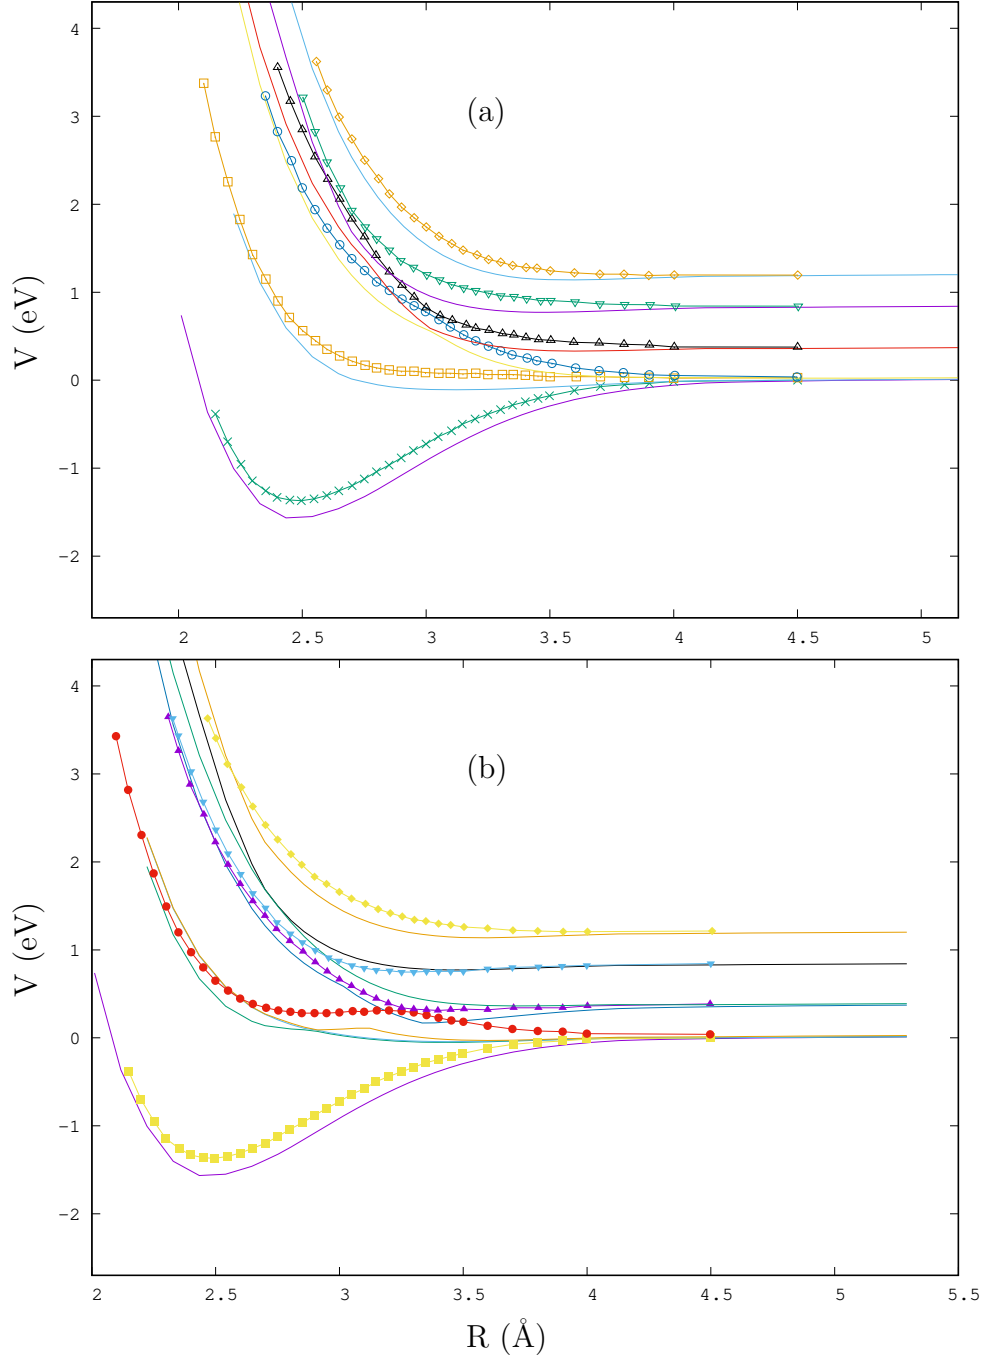

Figure S2: A comparison of the spin-coupled potential curves calculated in this work with the curves of Li *et al* [J. Quant. Spectrosc. and Radiat. Trans. (2014) **133**: 271]. (a) the  $\Omega = 0^-$  and (b) the  $\Omega = 0^+$  states. Solid lines are from the present work, and points are taken from the work of Li *et al.*

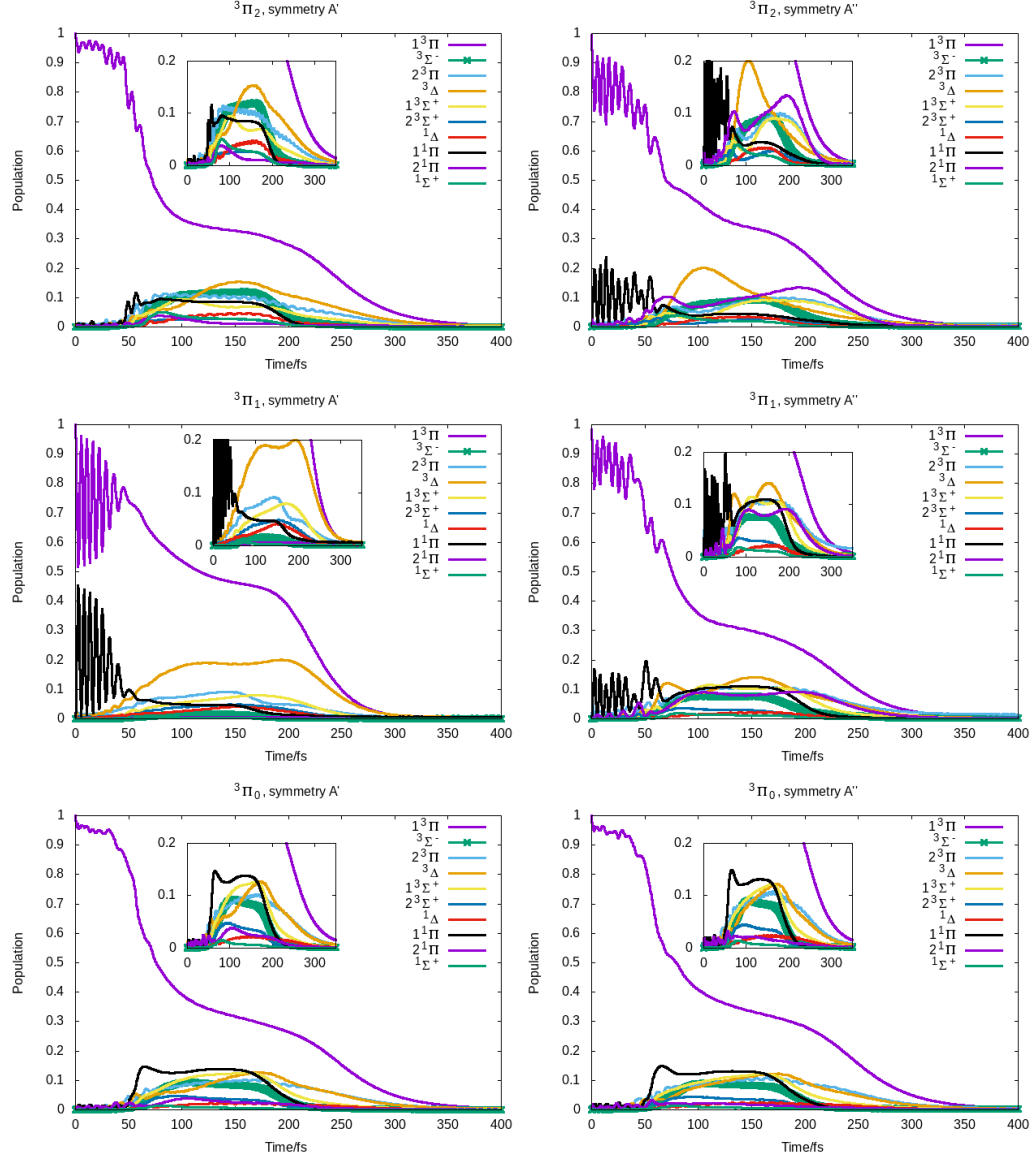

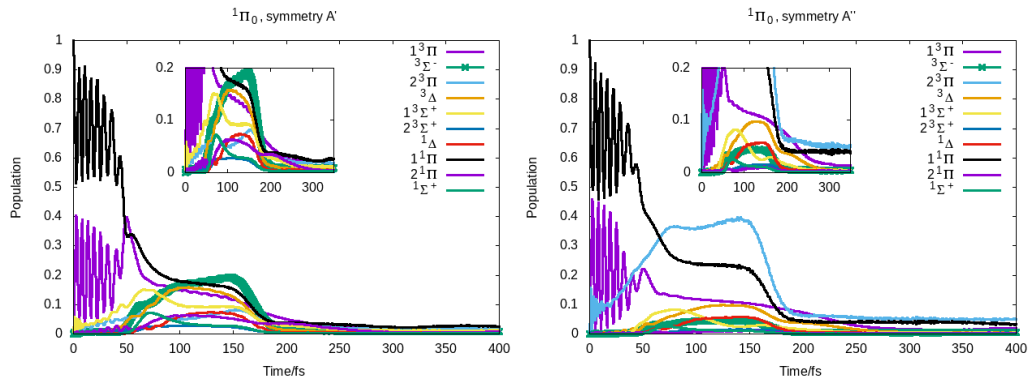

Figure S4: Population of non spin-orbit coupled states of IBr after a vertical excitation to the spin-orbit  $m_s$  components (spin projections) of the  $1^1\Pi$  state in the two symmetries of the  $C_s$  group. Each line specifies the population of the sum of the components of each state. The energy of the initial wavepacket is 2.84 eV (22906  $\text{cm}^{-1}$ ).

Table S1: Final norm and flux absorbed in each of the channels after the excitation to every excited state of the system. States are numbered by excitation energy.

| Excited<br>state | Final<br>norm | Flux absorbed (%) in channel |      |       |       |
|------------------|---------------|------------------------------|------|-------|-------|
|                  |               | 1                            | 2    | 3     | 4     |
| 2                | 0.282         | 98.18                        | 1.75 | 0.05  | 0.00  |
| 3                | 0.989         | 2.54                         | 5.39 | 85.79 | 6.27  |
| 4                | 0.998         | 64.80                        | 3.70 | 23.36 | 8.15  |
| 5                | 0.998         | 28.83                        | 3.75 | 60.48 | 6.94  |
| 6                | 0.094         | 99.69                        | 0.30 | 0.00  | 0.00  |
| 7                | 0.987         | 6.68                         | 9.42 | 78.87 | 5.03  |
| 8                | 0.995         | 66.25                        | 3.10 | 20.78 | 9.86  |
| 9                | 0.998         | 84.12                        | 1.87 | 8.20  | 5.80  |
| 10               | 0.999         | 82.90                        | 1.15 | 13.69 | 2.26  |
| 11               | 0.144         | 99.44                        | 0.53 | 0.02  | 0.02  |
| 12               | 0.966         | 1.39                         | 2.05 | 90.95 | 5.61  |
| 13               | 0.997         | 62.73                        | 2.34 | 22.64 | 12.29 |
| 14               | 0.998         | 90.31                        | 0.95 | 6.82  | 1.92  |
| 15               | 0.997         | 87.54                        | 0.93 | 9.71  | 1.82  |
| 16               | 0.109         | 99.87                        | 0.12 | 0.01  | 0.00  |
| 17               | 0.984         | 2.68                         | 5.26 | 86.91 | 5.15  |
| 18               | 0.992         | 83.77                        | 2.51 | 9.53  | 4.18  |
| 19               | 0.998         | 89.68                        | 1.17 | 6.51  | 2.64  |
| 20               | 0.999         | 61.25                        | 4.01 | 22.41 | 12.33 |
| 21               | 0.293         | 97.03                        | 2.70 | 0.24  | 0.03  |
| 22               | 0.985         | 70.33                        | 1.48 | 22.88 | 5.31  |
| 23               | 0.997         | 54.58                        | 2.90 | 30.72 | 11.80 |
| 24               | 0.998         | 87.31                        | 1.64 | 8.47  | 2.57  |
| 25               | 0.223         | 99.57                        | 0.37 | 5.53  | 3.58  |
| 26               | 0.959         | 55.35                        | 1.55 | 39.46 | 3.69  |
| 27               | 0.997         | 10.92                        | 5.32 | 60.50 | 24.09 |
| 28               | 0.999         | 55.66                        | 2.49 | 35.75 | 6.10  |
| 29               | 0.156         | 99.73                        | 0.17 | 0.09  | 0.00  |
| 30               | 0.966         | 14.40                        | 3.17 | 79.58 | 2.85  |
| 31               | 0.997         | 47.59                        | 2.70 | 28.49 | 21.22 |
| 32               | 0.999         | 36.29                        | 4.68 | 32.07 | 26.96 |
| 33               | 0.124         | 99.87                        | 0.12 | 0.01  | 0.00  |
| 34               | 0.960         | 39.01                        | 1.92 | 51.61 | 7.46  |
| 35               | 0.995         | 10.08                        | 3.42 | 70.95 | 15.54 |
| 36               | 0.999         | 52.32                        | 4.48 | 28.96 | 14.33 |
